# Supplementary material
Source: PubMed Central journal article supplement (PMC4107635)

38 **ONLINE REPOSITORY TEXT**

39

40 **METHODS**

41 **Subjects and blood samples**

42 Blood samples were obtained from subjects after written informed consent according a research  
43 protocol approved by the University of Utah Institutional Review Board. A retrospective review of  
44 records was completed.

45

46 **DNA isolation and gene sequencing**

47 DNA was extracted from whole blood using Genra Puregene chemistry (Qiagen, Valencia, CA).  
48 Genomic DNA from unaffected family members was PCR amplified at the RAG1 exon 2 locus using  
49 High Fidelity Phusion DNA Polymerase (New England BioLabs, Ipswich, MA) and the following  
50 primers: forward 5'-TGACTTGTTTTTCATT GTTCTCAGG-3', reverse 5'-  
51 TTGAGTTTCCCTCTGGGTTG-3'. Sanger sequencing was performed using standard methods (Applied  
52 Biosystems Capillary Sequencer) with the amplicons and the following primers: 5'- CAACATCTTC  
53 TGTCGCTGAC-3' and 5'-GAATCCCTCT GCCAGTACAG -3'.

55

56 **Autoantibody microarray**

57 Human serum samples obtained from family members with RAG1 deficiency were probed against an  
58 autoantibody protein microarray. Age-matched healthy controls and a lupus positive control were also  
59 probed. The microarray is a HydroGel slide printed with a selection of 76 glomerular, nuclear and other  
60 autoantigens as well as six control proteins in duplicates. The array is probed with serum samples,  
61 developed with Cy3 fluorescently labeled anti-IgG and Cy5 labeled anti-IgM, then scanned at 635nm and  
62 570 nm fluorescence, respectively. The mean fluorescence intensity is converted into an optimized dataset

63 based on the normal control. Data was analyzed for clustering and visualized by MultiExperiment Viewer  
64 (MeV), Cluster 3.0 and MapleTree v.0.2.3.2.

65

#### 66 **Anticytokine autoantibody assays**

67 Patient and control plasmas at 1:100 dilution were screened for autoantibodies using a bioplex assay  
68 against 9 cytokines. Normal PBMCs in the presence of patient or normal plasma (10% concentration)  
69 were stimulated for 15 minutes with either IFN- $\alpha$  or IFN- $\gamma$ . Cells were fixed and permeabilized and  
70 evaluated by flow cytometry for presence of either IFN- $\alpha$  or IFN- $\gamma$  induced phosphoSTAT-1.

71

#### 72 **Population genetic disease estimate**

73 *RAG1* and *RAG2* mutations known to be associated with congenital immune deficiency disorders  
74 were procured from the Human Gene Mutation Database (HGMD) v.2012.3. Variants included missense  
75 mutations, nonsense mutations, insertions and deletions. *RAG1* and *RAG2* variants in the 1000 Genomes  
76 database were identified. The 1000 Genomes database is a comprehensive database of genomes obtained  
77 from multiple populations around the world, and it identifies 98% of alleles whose frequency is >1% in  
78 these populations (E10). Lower frequency alleles are also identified in these populations. Variants  
79 present in both databases were intersected, resulting in only 2 disease-causing variants present in both  
80 HGMD and the European populations of the 1000 Genomes database. Allele frequencies of the European  
81 populations were then estimated from the 1000 Genomes database. Calculations were made focusing on  
82 the European 1000 Genomes populations for two reasons: 1) The case report involves a family of  
83 European descent, and 2) there is a strong bias for European populations in existing mutation data sets  
84 such as HGMD. The references associated with these variants were manually reviewed to ensure they  
85 were correctly associated with a primary immunodeficiency disease.

86

87

88

89

## REFERENCES

- 90
- 91 E1. Villa A, Sobacchi C, Notarangelo LD, Bozzi F, Abinun M, Abrahamsen TG, et al. V(D)J  
92 recombination defects in lymphocytes due to RAG mutations: severe immunodeficiency with a spectrum  
93 of clinical presentations. *Blood*. 2001 Jan 1;97(1):81-8.
- 94 E2. Sobacchi C, Marrella V, Rucci F, Vezzoni P, Villa A. RAG-dependent primary  
95 immunodeficiencies. *Hum Mutat*. 2006 Dec;27(12):1174-84.
- 96 E3. Gruber TA, Shah AJ, Hernandez M, Crooks GM, Abdel-Azim H, Gupta S, et al. Clinical and  
97 genetic heterogeneity in Omenn syndrome and severe combined immune deficiency. *Pediatr Transplant*.  
98 2009 Mar;13(2):244-50.
- 99 E4. Kuijpers TW, Ijspeert H, van Leeuwen EM, Jansen MH, Hazenberg MD, Weijer KC, et al.  
100 Idiopathic CD4+ T lymphopenia without autoimmunity or granulomatous disease in the slipstream of  
101 RAG mutations. *Blood*. 2011 Jun 2;117(22):5892-6.
- 102 E5. Asai E, Wada T, Sakakibara Y, Toga A, Toma T, Shimizu T, et al. Analysis of mutations and  
103 recombination activity in RAG-deficient patients. *Clin Immunol*. 2011 Feb;138(2):172-7.
- 104 E6. Kwan A, Church JA, Cowan MJ, Agarwal R, Kapoor N, Kohn DB, et al. Newborn screening for  
105 severe combined immunodeficiency and T-cell lymphopenia in California: Results of the first 2 years. *J*  
106 *Allergy Clin Immunol*. 2013 Jul;132(1):140-50 e7.
- 107 E7. Bell CJ, Dinwiddie DL, Miller NA, Hateley SL, Ganusova EE, Mudge J, et al. Carrier testing for  
108 severe childhood recessive diseases by next-generation sequencing. *Sci Transl Med*. 2011 Jan  
109 12;3(65):65ra4.
- 110 E8. Sheehan WJ, Delmonte OM, Miller DT, Roberts AE, Bonilla FA, Morra M, et al. Novel  
111 presentation of Omenn syndrome in association with aniridia. *J Allergy Clin Immunol*. 2009  
112 Apr;123(4):966-9.
- 113 E9. Safaei S, Pourpak Z, Moin M, Houshmand M. IL7R and RAG1/2 genes  
114 mutations/polymorphisms in patients with SCID. *Iran J Allergy Asthma Immunol*. 2011 Jun;10(2):129-  
115 32.

116 E10. Abecasis GR, Auton A, Brooks LD, DePristo MA, Durbin RM, Handsaker RE, et al. An  
117 integrated map of genetic variation from 1,092 human genomes. Nature. 2012 Nov 1;491(7422):56-65.

118

119

## 120 **FIGURE LEGENDS**

121

122 **Figure E1.** Heatmaps. Yellow indicates fold increase in signal compared to healthy controls  
123 (mean+1SD).

124

125 **Figure E2.** Anticytokine autoantibody evaluation. A. Patient and control plasmas were screened for  
126 autoantibodies against 9 cytokines. Patient data represents one plasma sample from patient P1, and two  
127 plasma samples from P2. B. Normal peripheral blood mononuclear cells in the presence of patient (pre-  
128 transplant) or normal plasma were stimulated for 15 minutes with either IFN $\alpha$  or IFN $\gamma$ . Cells were fixed  
129 and permeabilized and evaluated by flow cytometry for presence of either IFN $\alpha$ - or IFN $\gamma$ -induced  
130 phosphoSTAT-1.

131

## REPOSITORY TABLES

**Table E1.** Clinical laboratory evaluation of patients with RAG1 deficiency.

|                                        | <b>Patient 1 (II.1)</b><br><b>3.5 years</b>                            | Reference range<br>(age-adjusted) | <b>Patient 2 (II.4)</b><br><b>2 years</b>                       | Reference range<br>(age-adjusted) |
|----------------------------------------|------------------------------------------------------------------------|-----------------------------------|-----------------------------------------------------------------|-----------------------------------|
| Lymphocytes<br>cells/ $\mu$ l          | CD3+ 691 (47%)                                                         | 684-2170 (58-87%)                 | CD3+ <b>972</b> (62%) L                                         | 1460-5440 (53-81%)                |
| (% of total<br>lymphocytes)            | CD4+ 458 (31%)                                                         | 381-1469 (32-62%)                 | CD4+ <b>380</b> ( <b>24%</b> ) L                                | 1020-3600 (31-54%)                |
|                                        | CD4+CD45RA+ 46 (3%)                                                    | 44-869 (3-28%)                    | CD4+CD45RA+ <b>47</b> ( <b>3%</b> ) L                           | 200-3400 (15-70%)                 |
|                                        | CD4+CD45RO+ 427 (30%)                                                  | 92-1040 (16-46%)                  | CD4+CD45RO+ 395 (25%)                                           | 50-1500 (5-30%)                   |
|                                        | CD8+ 187 (13%)                                                         | 196-1060 (4-27%)                  | CD8+ <b>232</b> ( <b>15%</b> ) L                                | 570-2230 (16-38%)                 |
|                                        | NK cells 278 (19%)                                                     | 76-570 (4-27%)                    | NK cells 213 (14%)                                              | 80-340 (3-19%)                    |
|                                        | CD19+ B cells 464 ( <b>32%</b> H)                                      | 116-613 (5-23%)                   | CD19+ B cells <b>360</b> (23%) L                                | 430-3300 (11-45%)                 |
| Lymphocyte<br>mitogen<br>proliferation | Low proliferation to PHA.<br>Normal proliferation to Con A<br>and PWM. |                                   | Normal proliferation to<br>PHA, Con A, and PWM                  |                                   |
| Immunoglobulin<br>levels (mg/dL)       | IgG 1135<br>IgM 90<br>IgA 98<br>IgE 2                                  |                                   | IgG 973<br>IgA 44<br>IgM 70<br>IgE 1<br>(obtained at 11 months) |                                   |
| Additional<br>laboratory data          | T cell spectratyping:<br>Mild skewing for clonal T cell population     |                                   |                                                                 |                                   |

Abnormal results in **bold**. Con A=concanvalin A; H=high; L=low; PHA=phytohemagglutinin; PWM=pokeweed mitogen.

**Table E2.** *RAG1* mutation genotypes in the affected family.

Correlating protein change and references of previously reported cases with the same variant are listed.

Full references are available in the Online Repository Text.

| <i>RAG1</i> mutation | Exon | Protein         | References                                                                                                                                                                                                    |
|----------------------|------|-----------------|---------------------------------------------------------------------------------------------------------------------------------------------------------------------------------------------------------------|
| c.1420C>T            | 2    | p.Arg474Cys     | <i>Villa et al., 2001</i> (E1)<br><i>Sobacchi et al., 2006</i> (E2)<br><i>Gruber et al., 2009</i> (E3)<br><i>Kuijpers et al., 2011</i> (E4)<br><i>Asai et al., 2011</i> (E5)<br><i>Kwan et al., 2013</i> (E6) |
| c.2949delA           | 2    | p.Lys983AsnfsX9 | Novel mutation                                                                                                                                                                                                |

**Table E3.** Patient 2 IgG autoantibody values above 2.0  
(Fold increase compared to mean of controls +1SD)

| Antigen    | Patient 2 | Mother | Patient 1 | Control | Lupus  |
|------------|-----------|--------|-----------|---------|--------|
| ds RNA     | 15.18     | 2.80   | 1.22      | 0.86    | 297.86 |
| Collagen I | 2.77      | 1.52   | 1.26      | 0.93    | 0.00   |
| SS-A/SS-B  | 2.57      | 4.48   | 0.60      | 0.66    | 6.37   |
| Heparin    | 2.23      | 2.74   | 0.27      | 1.10    | 8.05   |
| H1         | 2.18      | 1.05   | 0.35      | 0.48    | 52.57  |

**Table E4.** Mother IgG autoantibody values above 2.0  
(Fold increase compared to mean of controls +1SD)

| Antigen              | Mother | Patient 1 | Patient 2 | Control | Lupus  |
|----------------------|--------|-----------|-----------|---------|--------|
| TPO                  | 14.86  | 0.76      | 0.82      | 0.88    | 1.81   |
| PL-7                 | 13.96  | 0.52      | 0.40      | 0.68    | 2.38   |
| TTG                  | 9.40   | 0.62      | 0.58      | 0.65    | 2.31   |
| M2 Antigen           | 8.92   | 0.64      | 0.39      | 0.85    | 4.31   |
| Cardiolipin          | 7.71   | 0.11      | 0.35      | 0.82    | 1.79   |
| Ro/SS-A(60KDa)       | 7.63   | 0.41      | 0.21      | 0.37    | 1.64   |
| U1-snRNP-C           | 7.36   | 0.61      | 0.52      | 0.87    | 2.51   |
| LC1                  | 6.95   | 0.66      | 0.51      | 0.74    | 3.38   |
| CENP-A               | 6.69   | 0.73      | 0.53      | 0.87    | 19.30  |
| GBM                  | 6.26   | 0.57      | 0.31      | 0.86    | 3.36   |
| L-Thyroxine          | 6.14   | 0.00      | 3.21      | 0.00    | 0.00   |
| Thyroglobulin        | 6.11   | 0.63      | 0.23      | 0.51    | 1.37   |
| CENP-B               | 6.01   | 0.60      | 0.36      | 0.95    | 2.25   |
| KU (P70/P80)         | 5.91   | 0.59      | 0.36      | 0.70    | 4.15   |
| U1-snRNP-BB'         | 4.94   | 0.47      | 0.61      | 0.40    | 3.24   |
| Scl-70               | 4.86   | 0.53      | 0.36      | 0.80    | 1.42   |
| C1q                  | 4.57   | 0.73      | 0.41      | 0.90    | 4.05   |
| SS-A/SS-B            | 4.48   | 2.57      | 0.60      | 0.66    | 6.37   |
| Entaktin EDTA        | 4.28   | 0.81      | 0.45      | 0.60    | 2.33   |
| Collagen VI          | 4.14   | 0.56      | 0.47      | 0.72    | 21.46  |
| Ro/SSA (52kd)        | 3.47   | 0.62      | 0.54      | 0.75    | 2.33   |
| PL-12                | 3.15   | 0.49      | 0.37      | 0.80    | 2.61   |
| Proteoglycan         | 3.09   | 0.37      | 0.21      | 0.54    | 0.80   |
| Intrinsic Factor     | 3.05   | 0.45      | 0.25      | 1.01    | 1.71   |
| DGPS                 | 2.81   | 0.91      | 0.93      | 1.00    | 11.17  |
| ds RNA               | 2.80   | 15.18     | 1.22      | 0.86    | 297.86 |
| Heparin              | 2.74   | 2.23      | 0.27      | 1.10    | 8.05   |
| B2-glycoprotein I    | 2.69   | 0.58      | 0.47      | 0.96    | 1.73   |
| Myosin               | 2.61   | 0.48      | 0.99      | 0.74    | 1.35   |
| LKM1                 | 2.58   | 0.47      | 0.23      | 0.70    | 1.59   |
| La/SS-B              | 2.48   | 0.20      | 0.11      | 1.04    | 0.85   |
| myelin basic protein | 2.40   | 0.87      | 0.66      | 0.82    | 1.70   |
| Topoisomerase        | 2.39   | 0.52      | 0.23      | 0.00    | 1.27   |
| SRP54                | 2.18   | 0.66      | 0.40      | 0.90    | 2.07   |
| Glom Extract         | 2.17   | 0.44      | 0.31      | 0.59    | 10.92  |
| Hemocyanin           | 2.08   | 0.41      | 0.30      | 0.64    | 2.11   |



**Table E5.** Patient 1 IgM autoantibody values above 2.0  
(Fold increase compared to mean of controls +1SD)

| Antigen    | Patient 1 | Mother | Patient 2 | Control | Lupus |
|------------|-----------|--------|-----------|---------|-------|
| Collagen I | 4.12      | 2.75   | 3.29      | 0.00    | 0.00  |
| ds RNA     | 3.29      | 4.39   | 1.10      | 0.00    | 18.12 |

**Table E6.** Mother IgM autoantibody values above 2.0  
(Fold increase compared to mean of controls +1SD)

| Antigen       | Mother | Patient 1 | Patient 2 | Control | Lupus |
|---------------|--------|-----------|-----------|---------|-------|
| ds RNA        | 4.39   | 3.29      | 1.10      | 0.00    | 18.12 |
| alpha-actinin | 2.80   | 0.52      | 0.35      | 1.05    | 0.00  |
| Collagen I    | 2.75   | 4.12      | 3.29      | 0.00    | 0.00  |
| DGPS          | 2.57   | 0.86      | 0.29      | 0.71    | 3.43  |

**Table E7.** Carrier rate of *RAG1* disease-associated variants in the European populations of the 1000 Genomes population database. Variants are known to be associated with immunodeficiency and were identified through HGMD. Positions are based on human genome reference NCBI build 37.3.

| Chromosome | Gene | Base position | Variant                     | Allele frequency | Carrier frequency | References                                          |
|------------|------|---------------|-----------------------------|------------------|-------------------|-----------------------------------------------------|
| 11         | RAG1 | 36596200      | c.1346G>A<br>(p.Arg449Lys)  | 0.00923          | 1:54              | Sobacchi et al., 2006(E2)<br>Bell et al., 2011(E7)  |
| 11         | RAG1 | 36597870      | c.3016A>G<br>(p.Met1006Val) | 0.00396          | 1:126             | Sheehan et al., 2009(E8)<br>Safaei et al., 2011(E9) |

## A. IgG autoantibody array

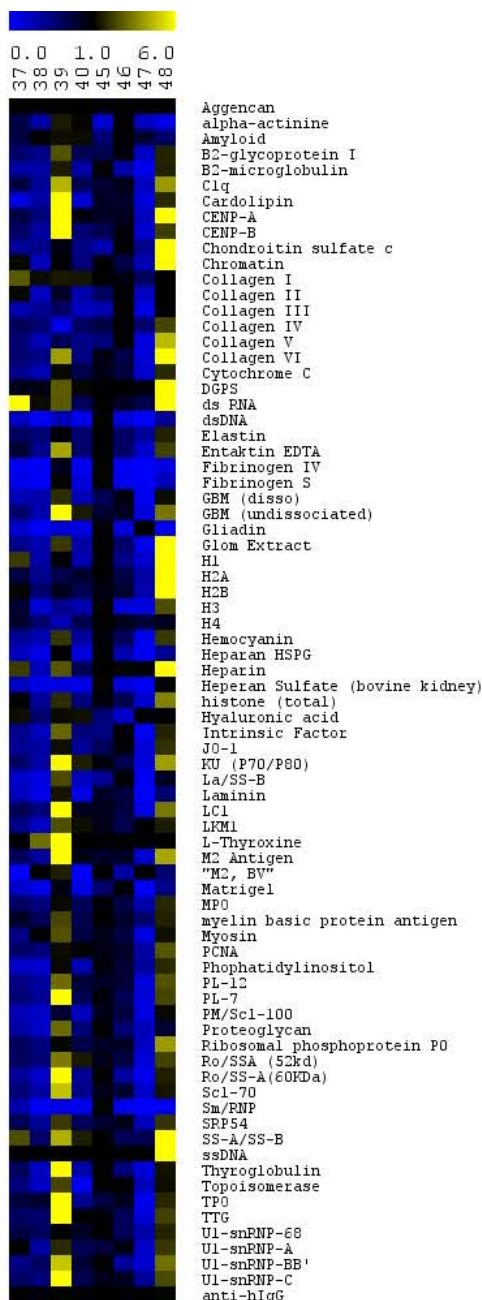

## B. IgM autoantibody array

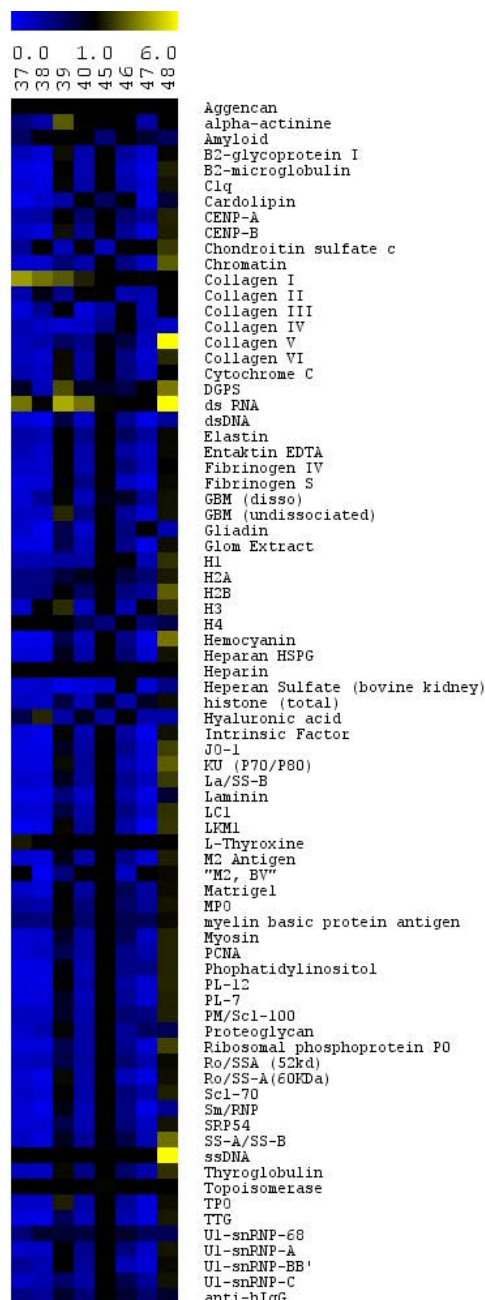Array samples:

- 37. Patient 1 (II.1)
- 38. Patient 2 (II.4)
- 39. Mother (I.2)
- 40. Father (I.1)
- 45. 2 year old healthy control
- 46. Adult healthy control
- 47. Adult healthy control
- 48. Lupus patient

A.

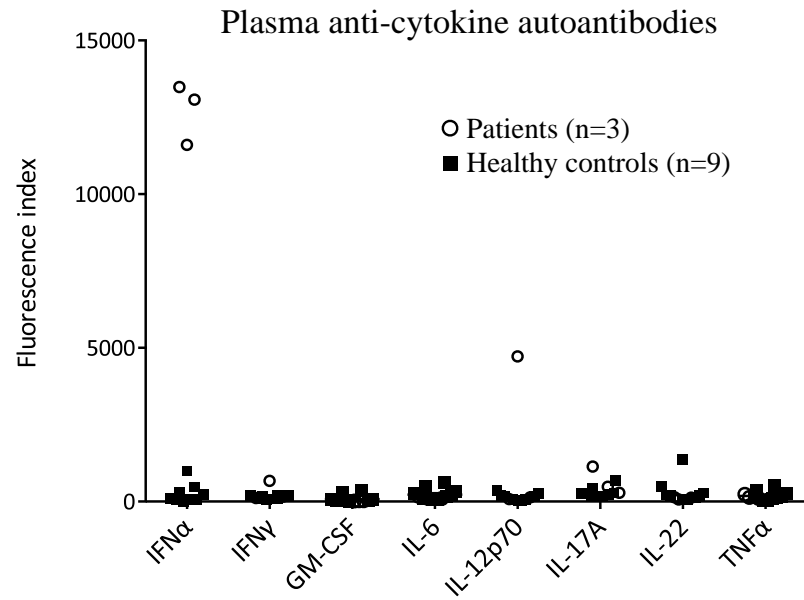

B.

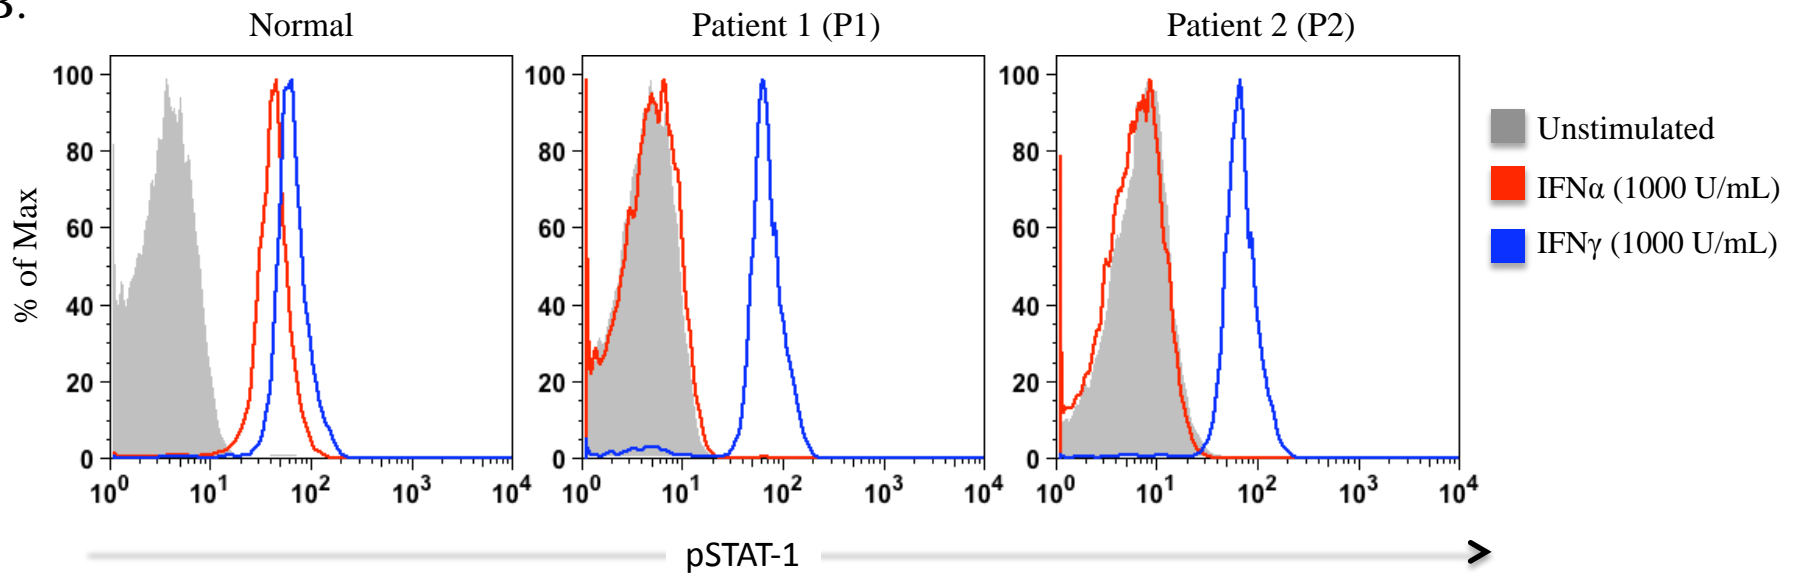

Supplement: NIHMS550337-supplement-01.pdf [file NIHMS550337-supplement-01.pdf]
